# Supplementary material for: Further characterization of M257 zircon standard: A working reference for SIMS analysis of Li isotopes
Source: Royal Society of Chemistry journal article supplement (doi:10.1039/c0ja00073f), 2010-10-27
Supplement: c0ja00073f.pdf [file c0ja00073f.pdf]

**Appendix 1 SIMS Li isotope ratio and concentration data for five zircon U-Pb age standards and NIST-614 glass standard.**

| <b>Sample@-spot#</b>          | <b><math>\delta^7\text{Li}_m</math> (‰)</b> | <b><math>\pm 2s</math></b> | <b><math>^7\text{Li}^+</math> (cps/nA)</b> | <b><math>\delta^7\text{Li}</math> (‰)</b> | <b>Li (ppm)</b> |
|-------------------------------|---------------------------------------------|----------------------------|--------------------------------------------|-------------------------------------------|-----------------|
| <b>Session 1 (1 Jan 2009)</b> |                                             |                            |                                            |                                           |                 |
| M257@-1.1                     | 30.4                                        | 1.3                        | 4905                                       |                                           |                 |
| M257@-1.2                     | 31.3                                        | 1.1                        | 5419                                       |                                           |                 |
| M257@-1.3                     | 30.5                                        | 1.7                        | 4846                                       |                                           |                 |
| M257@-1.4                     | 30.8                                        | 1.1                        | 5778                                       |                                           |                 |
| M257@-1.5                     | 30.7                                        | 1.3                        | 5210                                       |                                           |                 |
| M257@-1.6                     | 29.3                                        | 1.2                        | 5215                                       |                                           |                 |
| M257@-1.7                     | 29.8                                        | 1.3                        | 4895                                       |                                           |                 |
| M257@-1.8                     | 30.7                                        | 1.2                        | 4929                                       |                                           |                 |
| M257@-1.9                     | 31.1                                        | 1.2                        | 5017                                       |                                           |                 |
| M257@-1.10                    | 29.3                                        | 1.2                        | 5021                                       |                                           |                 |
| M257@-1.11                    | 31.4                                        | 1.1                        | 5522                                       |                                           |                 |
| M257@-1.12                    | 31.4                                        | 1.2                        | 4929                                       |                                           |                 |
| M257@-1.13                    | 30.6                                        | 1.3                        | 4982                                       |                                           |                 |
| M257@-1.14                    | 31.6                                        | 1.1                        | 5367                                       |                                           |                 |
| M257@-1.15                    | 30.3                                        | 1.2                        | 4954                                       |                                           |                 |
| M257@-1.16                    | 31.8                                        | 1.1                        | 5633                                       |                                           |                 |
| M257@-1.17                    | 30.5                                        | 1.3                        | 5005                                       |                                           |                 |
| M257@-1.18                    | 31.6                                        | 1.1                        | 5066                                       |                                           |                 |
| M257@-1.19                    | 30.1                                        | 1.1                        | 5374                                       |                                           |                 |
| M257@-1.20                    | 30.0                                        | 1.2                        | 5267                                       |                                           |                 |
| M257@-1.21                    | 31.9                                        | 1.1                        | 5519                                       |                                           |                 |
| M257@-1.22                    | 31.1                                        | 1.2                        | 5083                                       |                                           |                 |
| M257@-1.23                    | 30.1                                        | 1.2                        | 5521                                       |                                           |                 |
| M257@-1.24                    | 30.9                                        | 1.2                        | 5176                                       |                                           |                 |
| M257@-1.25                    | 32.1                                        | 1.1                        | 5189                                       |                                           |                 |
| M257@-1.26                    | 29.9                                        | 1.2                        | 5191                                       |                                           |                 |
| M257@-1.27                    | 31.4                                        | 1.1                        | 5641                                       |                                           |                 |
| M257@-1.28                    | 31.2                                        | 1.1                        | 5568                                       |                                           |                 |
| M257@-1.29                    | 30.8                                        | 1.1                        | 5193                                       |                                           |                 |
| M257@-1.30                    | 30.3                                        | 1.1                        | 5191                                       |                                           |                 |
| M257@-1.31                    | 30.3                                        | 1.1                        | 5674                                       |                                           |                 |
| M257@-1.32                    | 30.3                                        | 1.2                        | 5019                                       |                                           |                 |
| M257@-1.33                    | 30.8                                        | 1.5                        | 4967                                       |                                           |                 |
| M257@-1.34                    | 30.8                                        | 1.1                        | 5620                                       |                                           |                 |
| M257@-1.35                    | 30.3                                        | 1.1                        | 5721                                       |                                           |                 |

|            |      |     |      |
|------------|------|-----|------|
| M257@-1.36 | 30.1 | 1.1 | 5027 |
| M257@-1.37 | 31.3 | 1.1 | 5561 |
| M257@-1.38 | 29.7 | 1.1 | 5269 |
| M257@-1.39 | 30.6 | 1.0 | 6253 |
| M257@-1.40 | 30.6 | 1.1 | 5583 |
| M257@-1.41 | 30.4 | 1.1 | 5499 |
| M257@-1.42 | 29.6 | 1.2 | 5433 |
| M257@-1.43 | 29.6 | 1.2 | 4764 |
| M257@-1.44 | 30.5 | 1.1 | 5139 |
| M257@-1.45 | 29.9 | 1.1 | 5477 |
| M257@-1.46 | 30.8 | 1.1 | 5031 |
| M257@-1.47 | 30.6 | 1.1 | 5525 |
| M257@-1.48 | 31.2 | 1.1 | 5530 |
| M257@-1.49 | 30.6 | 1.1 | 5487 |
| M257@-1.50 | 29.7 | 1.1 | 5152 |

|             |      |     |       |     |      |
|-------------|------|-----|-------|-----|------|
| 91500@-1.1  | 29.7 | 1.0 | 6958  | 1.2 | 1.13 |
| 91500@-1.2  | 30.9 | 1.0 | 6716  | 2.4 | 1.09 |
| 91500@-1.3  | 30.2 | 1.5 | 7437  | 1.7 | 1.21 |
| 91500@-1.4  | 29.6 | 1.0 | 6849  | 1.1 | 1.11 |
| 91500@-1.5  | 32.2 | 2.2 | 8682  | 3.7 | 1.41 |
| 91500@-1.6  | 30.2 | 1.1 | 6637  | 1.7 | 1.08 |
| 91500@-1.7  | 31.1 | 1.0 | 7254  | 2.6 | 1.18 |
| 91500@-1.8  | 32.1 | 1.0 | 7771  | 3.6 | 1.26 |
| 91500@-1.9  | 33.8 | 0.7 | 14783 | 5.3 | 2.40 |
| 91500@-1.10 | 28.7 | 1.5 | 6945  | 0.2 | 1.13 |
| 91500@-1.11 | 29.2 | 1.0 | 6842  | 0.7 | 1.11 |
| 91500@-1.12 | 32.0 | 1.2 | 8521  | 3.5 | 1.39 |
| 91500@-1.13 | 33.6 | 3.2 | 8610  | 5.1 | 1.40 |
| 91500@-1.14 | 30.9 | 0.9 | 8044  | 2.4 | 1.31 |
| 91500@-1.15 | 31.1 | 1.7 | 7358  | 2.6 | 1.20 |
| 91500@-1.16 | 31.9 | 1.1 | 5829  | 3.4 | 0.95 |
| 91500@-1.17 | 33.2 | 0.7 | 15055 | 4.7 | 2.45 |
| 91500@-1.18 | 29.8 | 1.0 | 7138  | 1.3 | 1.16 |
| 91500@-1.19 | 31.7 | 1.0 | 7880  | 3.2 | 1.28 |
| 91500@-1.20 | 32.4 | 1.1 | 5933  | 3.9 | 0.97 |
| 91500@-1.21 | 33.7 | 0.7 | 13987 | 5.2 | 2.28 |
| 91500@-1.22 | 31.2 | 0.9 | 7976  | 2.7 | 1.30 |
| 91500@-1.23 | 31.4 | 0.8 | 10225 | 2.9 | 1.66 |
| 91500@-1.24 | 29.8 | 1.0 | 6812  | 1.3 | 1.11 |

|             |      |     |      |     |      |
|-------------|------|-----|------|-----|------|
| 91500@-1.25 | 30.5 | 2.9 | 7585 | 2.0 | 1.23 |
| 91500@-1.26 | 29.8 | 1.0 | 6983 | 1.3 | 1.14 |
| 91500@-1.27 | 30.9 | 1.0 | 6965 | 2.4 | 1.13 |
| 91500@-1.28 | 28.6 | 1.0 | 6869 | 0.1 | 1.12 |
| 91500@-1.29 | 31.7 | 1.3 | 8775 | 3.2 | 1.43 |

**Session 2 (28 Feb 2010)**

|            |      |     |      |
|------------|------|-----|------|
| M257@-2.1  | 36.3 | 1.3 | 4742 |
| M257@-2.2  | 36.7 | 1.3 | 4714 |
| M257@-2.3  | 37.0 | 1.3 | 4819 |
| M257@-2.4  | 37.7 | 1.3 | 4872 |
| M257@-2.5  | 36.3 | 1.2 | 5396 |
| M257@-2.6  | 37.2 | 1.2 | 5392 |
| M257@-2.7  | 36.7 | 1.1 | 4806 |
| M257@-2.8  | 36.2 | 1.2 | 4824 |
| M257@-2.9  | 37.7 | 1.2 | 4752 |
| M257@-2.10 | 36.3 | 1.3 | 4729 |
| M257@-2.11 | 37.8 | 1.2 | 5751 |
| M257@-2.12 | 35.9 | 1.1 | 4766 |
| M257@-2.13 | 38.3 | 1.3 | 4759 |
| M257@-2.14 | 36.3 | 1.3 | 4617 |
| M257@-2.15 | 37.6 | 1.3 | 4653 |
| M257@-2.16 | 39.0 | 1.3 | 4590 |
| M257@-2.17 | 38.3 | 1.3 | 4610 |
| M257@-2.18 | 36.4 | 1.3 | 4724 |
| M257@-2.19 | 35.7 | 1.3 | 4836 |
| M257@-2.20 | 37.3 | 1.3 | 4773 |
| M257@-2.21 | 35.7 | 1.3 | 4800 |
| M257@-2.22 | 36.7 | 1.1 | 4940 |
| M257@-2.23 | 36.0 | 1.2 | 4825 |
| M257@-2.24 | 36.9 | 1.2 | 4829 |
| M257@-2.25 | 36.6 | 1.2 | 4755 |
| M257@-2.26 | 36.5 | 1.3 | 4792 |
| M257@-2.27 | 36.9 | 1.2 | 4793 |
| M257@-2.28 | 36.3 | 1.4 | 4871 |
| M257@-2.29 | 37.2 | 1.2 | 4912 |
| M257@-2.30 | 37.8 | 1.2 | 5271 |
| M257@-2.31 | 35.2 | 1.2 | 4683 |
| M257@-2.32 | 36.7 | 1.2 | 4707 |
| M257@-2.33 | 36.7 | 1.2 | 4728 |

|            |      |     |      |
|------------|------|-----|------|
| M257@-2.34 | 37.2 | 1.2 | 4680 |
| M257@-2.35 | 35.8 | 1.2 | 4620 |
| M257@-2.36 | 36.7 | 1.2 | 4587 |
| M257@-2.37 | 36.4 | 1.3 | 4590 |
| M257@-2.38 | 36.6 | 1.2 | 4603 |
| M257@-2.39 | 36.4 | 1.1 | 5249 |
| M257@-2.40 | 37.6 | 1.1 | 5194 |
| M257@-2.41 | 35.6 | 1.1 | 5295 |
| M257@-2.42 | 37.7 | 1.1 | 5413 |

|            |      |     |       |      |      |
|------------|------|-----|-------|------|------|
| Ples@-2.1  | 34.7 | 1.0 | 7207  | 0.0  | 1.27 |
| Ples@-2.2  | 37.0 | 1.1 | 6511  | 2.3  | 1.15 |
| Ples@-2.3  | 36.5 | 1.1 | 6543  | 1.8  | 1.16 |
| Ples@-2.4  | 35.1 | 0.6 | 18834 | 0.4  | 3.33 |
| Ples@-2.5  | 34.7 | 0.7 | 14028 | 0.0  | 2.48 |
| Ples@-2.6  | 36.1 | 1.3 | 4335  | 1.4  | 0.77 |
| Ples@-2.7  | 34.0 | 1.2 | 6113  | -0.7 | 1.08 |
| Ples@-2.8  | 36.0 | 1.3 | 4537  | 1.3  | 0.80 |
| Ples@-2.9  | 35.1 | 1.2 | 5452  | 0.4  | 0.96 |
| Ples@-2.10 | 34.1 | 1.0 | 7338  | -0.6 | 1.30 |
| Ples@-2.11 | 34.5 | 1.3 | 4547  | -0.2 | 0.80 |
| Ples@-2.12 | 28.2 | 1.2 | 5327  | -6.5 | 0.94 |
| Ples@-2.13 | 32.6 | 1.4 | 3737  | -2.1 | 0.66 |
| Ples@-2.14 | 34.8 | 1.3 | 4531  | 0.1  | 0.80 |
| Ples@-2.15 | 35.2 | 0.6 | 24038 | 0.5  | 4.25 |
| Ples@-2.16 | 34.4 | 0.5 | 29311 | -0.3 | 5.18 |
| Ples@-2.17 | 35.4 | 0.7 | 14685 | 0.7  | 2.60 |
| Ples@-2.18 | 35.5 | 0.8 | 12401 | 0.8  | 2.19 |
| Ples@-2.19 | 36.1 | 0.8 | 14924 | 1.4  | 2.64 |
| Ples@-2.20 | 34.7 | 1.2 | 5257  | 0.0  | 0.93 |
| Ples@-2.21 | 35.8 | 1.2 | 5034  | 1.1  | 0.89 |
| Ples@-2.22 | 35.9 | 0.6 | 21797 | 1.2  | 3.85 |
| Ples@-2.23 | 36.2 | 0.7 | 13264 | 1.5  | 2.35 |
| Ples@-2.24 | 37.4 | 0.9 | 13501 | 2.7  | 2.39 |
| Ples@-2.25 | 35.3 | 0.8 | 12749 | 0.6  | 2.25 |
| Ples@-2.26 | 33.9 | 0.5 | 29023 | -0.8 | 5.13 |
| Ples@-2.27 | 32.4 | 0.5 | 32100 | -2.3 | 5.68 |
| Ples@-2.28 | 32.0 | 0.5 | 45219 | -2.7 | 8.00 |
| Ples@-2.29 | 32.8 | 0.6 | 17725 | -1.9 | 3.13 |
| Ples@-2.30 | 32.9 | 0.9 | 11243 | -1.8 | 1.99 |

|            |      |     |       |      |      |
|------------|------|-----|-------|------|------|
| Ples@-2.31 | 36.9 | 1.3 | 4499  | 2.2  | 0.80 |
| Ples@-2.32 | 35.4 | 1.1 | 6270  | 0.7  | 1.11 |
| Ples@-2.33 | 32.2 | 1.4 | 3634  | -2.5 | 0.64 |
| Ples@-2.34 | 35.8 | 0.6 | 17658 | 1.1  | 3.12 |
| Ples@-2.35 | 35.0 | 1.2 | 4897  | 0.3  | 0.87 |
| Ples@-2.36 | 33.6 | 0.9 | 8364  | -1.1 | 1.48 |
| Ples@-2.37 | 35.8 | 1.0 | 6457  | 1.1  | 1.14 |
| Ples@-2.38 | 35.0 | 1.3 | 4314  | 0.3  | 0.76 |
| Ples@-2.39 | 35.5 | 1.5 | 2932  | 0.8  | 0.52 |
| Ples@-2.40 | 34.6 | 1.2 | 4484  | -0.1 | 0.79 |

### Session 3 (18 Mar 2010)

|            |      |     |      |
|------------|------|-----|------|
| M257@-3.1  | 42.8 | 1.2 | 6342 |
| M257@-3.2  | 43.1 | 1.3 | 6311 |
| M257@-3.3  | 42.2 | 1.0 | 5712 |
| M257@-3.4  | 43.5 | 1.2 | 5661 |
| M257@-3.5  | 41.8 | 1.1 | 5607 |
| M257@-3.6  | 43.0 | 1.2 | 5593 |
| M257@-3.7  | 41.7 | 1.3 | 5556 |
| M257@-3.8  | 41.8 | 1.1 | 5612 |
| M257@-3.9  | 41.5 | 1.3 | 5569 |
| M257@-3.10 | 41.8 | 1.4 | 5575 |
| M257@-3.11 | 42.2 | 1.1 | 5489 |
| M257@-3.12 | 41.4 | 1.1 | 5574 |
| M257@-3.13 | 42.2 | 1.1 | 5391 |
| M257@-3.14 | 40.5 | 1.2 | 5394 |
| M257@-3.15 | 41.3 | 1.2 | 5388 |
| M257@-3.16 | 41.0 | 1.1 | 5366 |
| M257@-3.17 | 40.5 | 1.1 | 5426 |
| M257@-3.18 | 42.2 | 1.1 | 5369 |
| M257@-3.19 | 42.1 | 1.2 | 5214 |
| M257@-3.20 | 41.1 | 1.1 | 5277 |
| M257@-3.21 | 42.6 | 1.2 | 5936 |
| M257@-3.22 | 42.7 | 1.0 | 5917 |
| M257@-3.23 | 41.9 | 1.0 | 5961 |
| M257@-3.24 | 42.1 | 1.0 | 5840 |
| M257@-3.25 | 42.5 | 1.1 | 5825 |
| M257@-3.26 | 42.2 | 1.0 | 5853 |
| M257@-3.27 | 42.7 | 1.2 | 5815 |
| M257@-3.28 | 41.4 | 1.2 | 5508 |

|            |      |     |      |
|------------|------|-----|------|
| M257@-3.29 | 41.0 | 1.1 | 5421 |
| M257@-3.30 | 40.6 | 1.2 | 5425 |
| M257@-3.31 | 42.9 | 1.2 | 5406 |
| M257@-3.32 | 40.5 | 1.1 | 5410 |
| M257@-3.33 | 41.5 | 1.0 | 5470 |
| M257@-3.34 | 41.3 | 1.2 | 5419 |
| M257@-3.35 | 43.0 | 1.1 | 5345 |
| M257@-3.36 | 41.7 | 0.9 | 6946 |
| M257@-3.37 | 42.0 | 1.1 | 6881 |
| M257@-3.38 | 42.5 | 1.0 | 6929 |
| M257@-3.39 | 43.8 | 1.1 | 6639 |
| M257@-3.40 | 43.2 | 1.1 | 6877 |
| M257@-3.41 | 43.5 | 1.2 | 6843 |
| M257@-3.42 | 42.6 | 0.9 | 6742 |
| M257@-3.43 | 42.0 | 1.1 | 6558 |
| M257@-3.44 | 43.1 | 1.0 | 6537 |
| M257@-3.45 | 42.8 | 1.1 | 6573 |
| M257@-3.46 | 42.8 | 1.0 | 6482 |
| M257@-3.47 | 42.5 | 1.1 | 6446 |
| M257@-3.48 | 41.1 | 1.1 | 6341 |
| M257@-3.49 | 40.7 | 1.0 | 5415 |
| M257@-3.50 | 41.5 | 1.1 | 5543 |
| M257@-3.51 | 41.3 | 1.2 | 5375 |
| M257@-3.52 | 42.3 | 1.1 | 5379 |
| M257@-3.53 | 41.7 | 1.0 | 5257 |
| M257@-3.54 | 41.6 | 1.1 | 5312 |
| M257@-3.55 | 41.5 | 1.2 | 5611 |
| M257@-3.56 | 40.0 | 1.0 | 5601 |
| M257@-3.57 | 40.8 | 1.0 | 5556 |
| M257@-3.58 | 41.5 | 1.2 | 5457 |
| M257@-3.59 | 41.7 | 1.0 | 5392 |
| M257@-3.60 | 40.3 | 1.1 | 5389 |
| M257@-3.61 | 42.2 | 1.1 | 5372 |
| M257@-3.62 | 40.7 | 1.1 | 5408 |
| M257@-3.63 | 41.3 | 1.1 | 5674 |
| M257@-3.64 | 41.5 | 1.0 | 5640 |
| M257@-3.65 | 41.0 | 1.1 | 5477 |
| M257@-3.66 | 40.8 | 1.1 | 5588 |
| M257@-3.67 | 41.2 | 1.0 | 5498 |
| M257@-3.68 | 39.7 | 1.1 | 5473 |

|            |      |     |      |
|------------|------|-----|------|
| M257@-3.69 | 40.1 | 1.1 | 5531 |
| M257@-3.70 | 41.1 | 1.1 | 5444 |
| M257@-3.71 | 40.6 | 1.2 | 5497 |
| M257@-3.72 | 41.8 | 1.0 | 6581 |
| M257@-3.73 | 40.6 | 1.0 | 6505 |
| M257@-3.74 | 40.9 | 1.1 | 5085 |
| M257@-3.75 | 40.3 | 1.1 | 5338 |

|             |      |     |       |      |      |
|-------------|------|-----|-------|------|------|
| 91500@-3.1  | 43.1 | 1.7 | 9939  | 3.5  | 1.48 |
| 91500@-3.2  | 40.4 | 1.1 | 4423  | 0.8  | 0.66 |
| 91500@-3.3  | 39.8 | 2.0 | 7000  | 0.2  | 1.04 |
| 91500@-3.4  | 40.5 | 1.2 | 3892  | 0.9  | 0.58 |
| 91500@-3.5  | 41.9 | 0.8 | 9769  | 2.3  | 1.46 |
| 91500@-3.6  | 38.0 | 1.7 | 2673  | -1.6 | 0.40 |
| 91500@-3.7  | 39.9 | 1.2 | 3753  | 0.3  | 0.56 |
| 91500@-3.8  | 37.7 | 1.4 | 3772  | -1.9 | 0.56 |
| 91500@-3.9  | 39.8 | 1.3 | 3660  | 0.2  | 0.55 |
| 91500@-3.10 | 40.2 | 0.8 | 8346  | 0.6  | 1.25 |
| 91500@-3.11 | 40.8 | 1.0 | 6769  | 1.2  | 1.01 |
| 91500@-3.12 | 39.6 | 1.4 | 2889  | 0.0  | 0.43 |
| 91500@-3.13 | 40.3 | 1.7 | 7157  | 0.7  | 1.07 |
| 91500@-3.14 | 41.3 | 1.6 | 2997  | 1.7  | 0.45 |
| 91500@-3.15 | 39.9 | 1.5 | 2681  | 0.3  | 0.40 |
| 91500@-3.16 | 39.9 | 1.5 | 2681  | 0.3  | 0.40 |
| 91500@-3.17 | 41.7 | 1.7 | 9587  | 2.1  | 1.43 |
| 91500@-3.18 | 40.9 | 1.7 | 2778  | 1.3  | 0.41 |
| 91500@-3.19 | 40.0 | 1.3 | 3579  | 0.4  | 0.53 |
| 91500@-3.20 | 39.7 | 1.3 | 3134  | 0.1  | 0.47 |
| 91500@-3.21 | 42.0 | 1.4 | 10385 | 2.4  | 1.55 |

|              |      |     |      |      |      |
|--------------|------|-----|------|------|------|
| TEMORA@-3.1  | 34.6 | 2.9 | 673  | -5.0 | 0.10 |
| TEMORA@-3.2  | 33.5 | 1.6 | 2392 | -6.1 | 0.36 |
| TEMORA@-3.3  | 30.6 | 3.3 | 1032 | -9.0 | 0.15 |
| TEMORA@-3.4  | 30.2 | 2.4 | 943  | -9.4 | 0.14 |
| TEMORA@-3.5  | 31.8 | 1.6 | 2216 | -7.8 | 0.33 |
| TEMORA@-3.6  | 37.9 | 3.8 | 3355 | -1.7 | 0.50 |
| TEMORA@-3.7  | 42.4 | 4.4 | 277  | 2.8  | 0.04 |
| TEMORA@-3.8  | 36.4 | 1.7 | 1810 | -3.2 | 0.27 |
| TEMORA@-3.9  | 38.2 | 2.3 | 967  | -1.4 | 0.14 |
| TEMORA@-3.10 | 32.7 | 3.3 | 468  | -6.9 | 0.07 |

|              |      |     |      |       |      |
|--------------|------|-----|------|-------|------|
| TEMORA@-3.11 | 36.8 | 1.5 | 2797 | -2.8  | 0.42 |
| TEMORA@-3.12 | 38.2 | 1.8 | 1753 | -1.4  | 0.26 |
| TEMORA@-3.13 | 33.3 | 2.8 | 681  | -6.3  | 0.10 |
| TEMORA@-3.14 | 35.7 | 1.6 | 2253 | -3.9  | 0.34 |
| TEMORA@-3.15 | 30.3 | 3.8 | 376  | -9.3  | 0.06 |
| TEMORA@-3.16 | 40.7 | 5.4 | 192  | 1.1   | 0.03 |
| TEMORA@-3.17 | 33.2 | 3.8 | 372  | -6.4  | 0.06 |
| TEMORA@-3.18 | 34.4 | 1.4 | 2793 | -5.2  | 0.42 |
| TEMORA@-3.19 | 27.5 | 2.5 | 838  | -12.1 | 0.13 |

**Session 4 (22 Mar 2010)**

|            |      |     |      |
|------------|------|-----|------|
| M257@-4.1  | 40.7 | 1.1 | 4955 |
| M257@-4.2  | 39.0 | 1.2 | 4738 |
| M257@-4.3  | 40.1 | 1.2 | 4779 |
| M257@-4.4  | 38.2 | 1.2 | 4698 |
| M257@-4.5  | 39.5 | 1.2 | 4723 |
| M257@-4.6  | 38.3 | 1.2 | 4747 |
| M257@-4.7  | 38.8 | 1.2 | 4814 |
| M257@-4.8  | 40.0 | 1.1 | 4866 |
| M257@-4.9  | 38.0 | 1.2 | 4965 |
| M257@-4.10 | 38.1 | 1.2 | 4837 |
| M257@-4.11 | 38.1 | 1.1 | 4866 |
| M257@-4.12 | 38.9 | 1.1 | 5767 |
| M257@-4.13 | 38.5 | 1.0 | 5202 |
| M257@-4.14 | 38.3 | 1.0 | 5144 |
| M257@-4.15 | 38.1 | 1.4 | 4748 |
| M257@-4.16 | 38.1 | 1.4 | 4642 |
| M257@-4.17 | 39.3 | 1.2 | 5210 |
| M257@-4.18 | 38.2 | 1.2 | 5084 |
| M257@-4.19 | 37.5 | 1.2 | 5080 |
| M257@-4.20 | 38.5 | 1.4 | 4630 |
| M257@-4.21 | 38.7 | 1.2 | 4646 |
| M257@-4.22 | 38.2 | 1.2 | 4626 |
| M257@-4.23 | 38.3 | 1.3 | 4952 |
| M257@-4.24 | 39.3 | 1.2 | 4628 |
| M257@-4.25 | 38.4 | 1.2 | 4761 |
| M257@-4.26 | 39.5 | 1.4 | 4631 |
| M257@-4.27 | 38.7 | 1.2 | 4818 |
| M257@-4.28 | 38.9 | 1.5 | 4981 |
| M257@-4.29 | 37.4 | 1.2 | 5137 |



|            |      |     |      |
|------------|------|-----|------|
| M257@-4.30 | 37.9 | 1.3 | 5047 |
| M257@-4.31 | 38.0 | 1.4 | 4912 |
| M257@-4.32 | 37.4 | 1.2 | 5106 |
| M257@-4.33 | 39.0 | 1.2 | 5044 |
| M257@-4.34 | 37.1 | 1.2 | 5024 |
| M257@-4.35 | 37.2 | 1.2 | 4973 |
| M257@-4.36 | 37.4 | 1.2 | 5122 |
| M257@-4.37 | 38.4 | 1.3 | 5033 |
| M257@-4.38 | 37.8 | 1.2 | 5063 |
| M257@-4.39 | 39.6 | 1.8 | 4960 |
| M257@-4.40 | 39.1 | 1.4 | 5051 |
| M257@-4.41 | 37.4 | 1.2 | 5080 |
| M257@-4.42 | 38.3 | 1.2 | 4996 |
| M257@-4.43 | 39.0 | 1.2 | 5003 |
| M257@-4.44 | 38.5 | 1.6 | 5054 |
| M257@-4.45 | 38.1 | 1.3 | 5029 |

|             |      |     |      |      |      |
|-------------|------|-----|------|------|------|
| BR266@-4.1  | 42.2 | 1.3 | 4133 | 5.8  | 0.72 |
| BR266@-4.2  | 42.8 | 1.3 | 3971 | 6.4  | 0.69 |
| BR266@-4.3  | 42.5 | 1.3 | 3993 | 6.1  | 0.70 |
| BR266@-4.4  | 41.4 | 1.4 | 3183 | 5.0  | 0.55 |
| BR266@-4.5  | 36.2 | 1.5 | 2835 | -0.2 | 0.49 |
| BR266@-4.6  | 36.8 | 1.5 | 2849 | 0.4  | 0.50 |
| BR266@-4.7  | 36.4 | 1.6 | 2638 | 0.0  | 0.46 |
| BR266@-4.8  | 38.9 | 1.5 | 3152 | 2.5  | 0.55 |
| BR266@-4.9  | 41.8 | 1.4 | 3584 | 5.4  | 0.62 |
| BR266@-4.10 | 41.1 | 1.3 | 3709 | 4.7  | 0.65 |
| BR266@-4.11 | 41.1 | 1.3 | 3893 | 4.7  | 0.68 |
| BR266@-4.12 | 41.0 | 1.3 | 3713 | 4.6  | 0.65 |
| BR266@-4.13 | 41.3 | 1.4 | 3625 | 4.9  | 0.63 |
| BR266@-4.14 | 39.1 | 1.6 | 3284 | 2.7  | 0.57 |
| BR266@-4.15 | 37.0 | 1.5 | 2815 | 0.6  | 0.49 |
| BR266@-4.16 | 36.3 | 1.6 | 2604 | -0.1 | 0.45 |
| BR266@-4.17 | 35.4 | 1.7 | 2509 | -1.0 | 0.44 |
| BR266@-4.18 | 36.0 | 1.7 | 2384 | -0.4 | 0.42 |
| BR266@-4.19 | 40.5 | 1.7 | 2133 | 4.1  | 0.37 |
| BR266@-4.20 | 38.7 | 1.7 | 2078 | 2.3  | 0.36 |
| BR266@-4.21 | 39.2 | 2.1 | 2055 | 2.8  | 0.36 |
| BR266@-4.22 | 38.9 | 1.7 | 2100 | 2.5  | 0.37 |
| BR266@-4.23 | 36.2 | 1.6 | 2446 | -0.2 | 0.43 |

|             |      |     |       |      |      |
|-------------|------|-----|-------|------|------|
| BR266@-4.24 | 37.0 | 1.6 | 2587  | 0.6  | 0.45 |
| BR266@-4.25 | 38.1 | 1.5 | 2816  | 1.7  | 0.49 |
| BR266@-4.26 | 38.7 | 1.4 | 3383  | 2.3  | 0.59 |
| BR266@-4.27 | 41.5 | 1.4 | 3713  | 5.1  | 0.65 |
| BR266@-4.28 | 41.1 | 1.2 | 3858  | 4.7  | 0.67 |
| BR266@-4.29 | 41.2 | 1.1 | 4456  | 4.8  | 0.78 |
| BR266@-4.30 | 41.9 | 1.0 | 6372  | 5.5  | 1.11 |
| BR266@-4.31 | 41.1 | 1.0 | 6109  | 4.7  | 1.06 |
| BR266@-4.32 | 41.8 | 1.0 | 6308  | 5.4  | 1.10 |
| BR266@-4.33 | 37.6 | 1.3 | 3134  | 1.2  | 0.55 |
| BR266@-4.34 | 38.6 | 1.4 | 3091  | 2.2  | 0.54 |
| BR266@-4.35 | 38.4 | 1.6 | 2866  | 2.0  | 0.50 |
| BR266@-4.36 | 41.4 | 1.1 | 6031  | 5.0  | 1.05 |
| BR266@-4.37 | 36.5 | 2.0 | 2035  | 0.1  | 0.35 |
| BR266@-4.38 | 38.0 | 1.6 | 2545  | 1.6  | 0.44 |
| BR266@-4.39 | 41.3 | 1.3 | 3833  | 4.9  | 0.67 |
| BR266@-4.40 | 40.3 | 1.2 | 5836  | 3.9  | 1.02 |
| BR266@-4.41 | 40.0 | 1.6 | 2677  | 3.6  | 0.47 |
| BR266@-4.42 | 39.1 | 1.6 | 2646  | 2.7  | 0.46 |
| BR266@-4.43 | 40.1 | 1.7 | 2559  | 3.7  | 0.45 |
| BR266@-4.44 | 37.4 | 1.6 | 2573  | 1.0  | 0.45 |
| BR266@-4.45 | 40.4 | 1.6 | 2577  | 4.0  | 0.45 |
|             |      |     |       |      |      |
| Ples@-4.1   | 29.5 | 0.9 | 15127 | -6.9 | 2.64 |
| Ples@-4.2   | 28.7 | 0.6 | 17009 | -7.7 | 2.96 |
| Ples@-4.3   | 33.1 | 0.8 | 13303 | -3.3 | 2.32 |
| Ples@-4.4   | 38.0 | 1.1 | 13299 | 1.6  | 2.32 |
| Ples@-4.5   | 32.3 | 1.0 | 6373  | -4.1 | 1.11 |
| Ples@-4.6   | 35.4 | 1.1 | 6519  | -1.0 | 1.14 |
| Ples@-4.7   | 38.1 | 0.9 | 19796 | 1.7  | 3.45 |
| Ples@-4.8   | 36.5 | 0.9 | 8380  | 0.1  | 1.46 |
| Ples@-4.9   | 35.8 | 1.0 | 6314  | -0.6 | 1.10 |
| Ples@-4.10  | 32.6 | 0.7 | 12086 | -3.8 | 2.11 |
| Ples@-4.11  | 39.0 | 1.8 | 5671  | 2.6  | 0.99 |
| Ples@-4.12  | 37.8 | 1.1 | 5569  | 1.4  | 0.97 |
| Ples@-4.13  | 34.3 | 0.8 | 9097  | -2.1 | 1.58 |
| Ples@-4.14  | 38.3 | 1.0 | 6531  | 1.9  | 1.14 |
| Ples@-4.15  | 38.1 | 1.0 | 6187  | 1.7  | 1.08 |
| Ples@-4.16  | 37.9 | 1.3 | 4697  | 1.5  | 0.82 |
| Ples@-4.17  | 39.2 | 1.2 | 4340  | 2.8  | 0.76 |

|            |      |     |       |      |      |
|------------|------|-----|-------|------|------|
| Ples@-4.18 | 37.6 | 1.2 | 4652  | 1.2  | 0.81 |
| Ples@-4.19 | 35.8 | 0.9 | 10970 | -0.6 | 1.91 |
| Ples@-4.20 | 37.8 | 1.1 | 5460  | 1.4  | 0.95 |
| Ples@-4.21 | 38.6 | 1.2 | 5648  | 2.2  | 0.98 |
| Ples@-4.22 | 37.5 | 1.0 | 6501  | 1.1  | 1.13 |
| Ples@-4.23 | 38.4 | 0.9 | 6637  | 2.0  | 1.16 |
| Ples@-4.24 | 37.9 | 0.9 | 6635  | 1.5  | 1.16 |

|               |      |     |      |
|---------------|------|-----|------|
| NIST614@-4.1  | 49.2 | 1.5 | 3263 |
| NIST614@-4.2  | 49.4 | 1.5 | 3199 |
| NIST614@-4.3  | 51.9 | 1.5 | 3211 |
| NIST614@-4.4  | 51.8 | 1.5 | 3153 |
| NIST614@-4.5  | 50.6 | 1.5 | 3161 |
| NIST614@-4.6  | 50.5 | 1.5 | 3264 |
| NIST614@-4.7  | 50.2 | 1.5 | 3238 |
| NIST614@-4.8  | 51.1 | 1.5 | 3207 |
| NIST614@-4.9  | 49.3 | 1.6 | 3193 |
| NIST614@-4.10 | 50.8 | 1.6 | 3217 |
| NIST614@-4.11 | 50.7 | 1.5 | 3158 |
| NIST614@-4.12 | 49.5 | 1.5 | 3259 |
| NIST614@-4.13 | 51.5 | 1.6 | 3139 |
| NIST614@-4.14 | 51.5 | 1.6 | 3193 |
| NIST614@-4.15 | 50.0 | 1.5 | 3181 |
| NIST614@-4.16 | 51.8 | 1.5 | 3235 |
| NIST614@-4.17 | 51.1 | 1.5 | 3228 |
| NIST614@-4.18 | 51.5 | 1.8 | 3217 |
| NIST614@-4.19 | 50.5 | 1.5 | 3224 |
| NIST614@-4.20 | 50.7 | 1.6 | 3193 |
| NIST614@-4.21 | 52.3 | 1.6 | 3191 |
| NIST614@-4.22 | 49.7 | 1.5 | 3186 |
| NIST614@-4.23 | 50.8 | 1.5 | 3193 |
| NIST614@-4.24 | 50.2 | 1.6 | 3237 |

**Session 5 (04 May 2010)**

|           |      |     |      |
|-----------|------|-----|------|
| M257@-5.1 | 39.1 | 1.2 | 6763 |
| M257@-5.2 | 38.3 | 1.1 | 6722 |
| M257@-5.3 | 38.6 | 1.1 | 7115 |
| M257@-5.4 | 37.2 | 1.1 | 6818 |
| M257@-5.5 | 38.0 | 1.1 | 6750 |
| M257@-5.6 | 36.7 | 1.0 | 6611 |

|            |      |     |      |
|------------|------|-----|------|
| M257@-5.7  | 38.7 | 1.1 | 6634 |
| M257@-5.8  | 37.5 | 1.1 | 6571 |
| M257@-5.9  | 39.2 | 1.3 | 6533 |
| M257@-5.10 | 38.8 | 1.0 | 6741 |
| M257@-5.11 | 38.9 | 1.1 | 6901 |
| M257@-5.12 | 38.9 | 1.0 | 6900 |
| M257@-5.13 | 38.6 | 1.0 | 6892 |
| M257@-5.14 | 38.0 | 1.2 | 5503 |
| M257@-5.15 | 37.0 | 1.3 | 5747 |
| M257@-5.16 | 37.9 | 1.5 | 5767 |
| M257@-5.17 | 37.9 | 1.4 | 5524 |
| M257@-5.18 | 39.6 | 1.2 | 5262 |
| M257@-5.19 | 37.2 | 1.3 | 5056 |
| M257@-5.20 | 37.8 | 1.3 | 4928 |
| M257@-5.21 | 36.0 | 1.3 | 4854 |
| M257@-5.22 | 37.7 | 1.3 | 4903 |
| M257@-5.23 | 36.7 | 1.3 | 4921 |
| M257@-5.24 | 37.4 | 1.3 | 4773 |
| M257@-5.25 | 36.9 | 1.4 | 4754 |
| M257@-5.26 | 37.1 | 1.4 | 5537 |
| M257@-5.27 | 38.2 | 1.3 | 5643 |
| M257@-5.28 | 37.6 | 1.4 | 5161 |
| M257@-5.29 | 38.2 | 1.4 | 5341 |
| M257@-5.30 | 37.7 | 1.3 | 5124 |
| M257@-5.31 | 37.7 | 1.4 | 5580 |
| M257@-5.32 | 39.3 | 1.3 | 5334 |
| M257@-5.33 | 36.0 | 1.5 | 5045 |
| M257@-5.34 | 38.8 | 1.3 | 6110 |
| M257@-5.35 | 38.1 | 1.3 | 6387 |
| M257@-5.36 | 38.6 | 1.3 | 5312 |
| M257@-5.37 | 36.7 | 1.3 | 5259 |
| M257@-5.38 | 38.9 | 1.6 | 5403 |
| M257@-5.39 | 37.2 | 1.4 | 4958 |
| M257@-5.40 | 38.8 | 1.3 | 5137 |
| M257@-5.41 | 37.9 | 1.5 | 4731 |
| M257@-5.42 | 37.9 | 1.5 | 5162 |
| M257@-5.43 | 37.9 | 1.6 | 5049 |
| M257@-5.44 | 37.7 | 1.3 | 5160 |
| M257@-5.45 | 38.1 | 1.6 | 5760 |
| M257@-5.46 | 38.0 | 1.4 | 5780 |

|            |      |     |      |
|------------|------|-----|------|
| M257@-5.47 | 37.1 | 1.6 | 5329 |
| M257@-5.48 | 36.6 | 1.3 | 5456 |
| M257@-5.49 | 37.0 | 1.6 | 5443 |
| M257@-5.50 | 36.6 | 1.7 | 5188 |
| M257@-5.51 | 36.5 | 1.4 | 5268 |
| M257@-5.52 | 39.3 | 1.4 | 5130 |
| M257@-5.53 | 37.7 | 1.7 | 4591 |
| M257@-5.54 | 37.7 | 1.6 | 4542 |
| M257@-5.55 | 37.6 | 1.9 | 4783 |
| M257@-5.56 | 38.2 | 1.8 | 5647 |
| M257@-5.57 | 36.5 | 1.7 | 4889 |
| M257@-5.58 | 37.6 | 1.6 | 5031 |
| M257@-5.59 | 38.2 | 1.4 | 6309 |
| M257@-5.60 | 38.4 | 1.4 | 6227 |
| M257@-5.61 | 37.5 | 1.9 | 5042 |
| M257@-5.62 | 37.0 | 1.7 | 5023 |
| M257@-5.63 | 37.8 | 1.7 | 5243 |
| M257@-5.64 | 37.8 | 1.5 | 5142 |
| M257@-5.65 | 36.9 | 1.6 | 5128 |
| M257@-5.66 | 36.4 | 1.7 | 5107 |

|               |      |     |      |
|---------------|------|-----|------|
| NIST614@-5.1  | 48.3 | 1.6 | 3232 |
| NIST614@-5.2  | 49.2 | 1.5 | 3294 |
| NIST614@-5.3  | 50.5 | 1.5 | 3299 |
| NIST614@-5.4  | 49.2 | 1.5 | 3229 |
| NIST614@-5.5  | 47.2 | 1.5 | 3285 |
| NIST614@-5.6  | 49.6 | 1.5 | 3188 |
| NIST614@-5.7  | 47.9 | 1.5 | 3294 |
| NIST614@-5.8  | 48.9 | 1.5 | 3270 |
| NIST614@-5.9  | 48.9 | 1.5 | 3213 |
| NIST614@-5.10 | 48.6 | 1.5 | 3217 |
| NIST614@-5.11 | 48.2 | 1.8 | 3231 |
| NIST614@-5.12 | 49.1 | 1.5 | 3234 |
| NIST614@-5.13 | 48.4 | 1.5 | 3260 |
| NIST614@-5.14 | 49.9 | 1.6 | 3258 |
| NIST614@-5.15 | 50.0 | 1.5 | 3273 |
| NIST614@-5.16 | 49.2 | 1.5 | 3276 |
| NIST614@-5.17 | 49.0 | 1.8 | 3222 |
| NIST614@-5.18 | 50.2 | 1.9 | 3217 |
| NIST614@-5.19 | 50.0 | 1.6 | 3246 |

|               |      |     |      |
|---------------|------|-----|------|
| NIST614@-5.20 | 48.8 | 1.6 | 3211 |
|---------------|------|-----|------|

**Session 6 (19 May 2010)**

|            |      |     |      |
|------------|------|-----|------|
| M257@-6.1  | 40.7 | 1.2 | 4966 |
| M257@-6.2  | 41.0 | 1.3 | 4863 |
| M257@-6.3  | 41.3 | 1.4 | 4875 |
| M257@-6.4  | 40.6 | 1.2 | 5003 |
| M257@-6.5  | 40.0 | 1.2 | 4990 |
| M257@-6.6  | 41.4 | 1.2 | 4969 |
| M257@-6.7  | 40.9 | 1.2 | 5029 |
| M257@-6.8  | 41.8 | 1.2 | 4941 |
| M257@-6.9  | 41.3 | 1.2 | 4982 |
| M257@-6.10 | 41.3 | 1.2 | 5122 |
| M257@-6.11 | 43.3 | 1.2 | 5093 |
| M257@-6.12 | 40.9 | 1.5 | 5005 |
| M257@-6.13 | 41.4 | 1.3 | 5013 |
| M257@-6.14 | 42.0 | 1.2 | 5008 |
| M257@-6.15 | 42.0 | 1.2 | 4971 |
| M257@-6.16 | 41.7 | 1.2 | 4933 |
| M257@-6.17 | 41.0 | 1.2 | 4993 |
| M257@-6.18 | 41.5 | 1.2 | 5038 |
| M257@-6.19 | 41.9 | 1.3 | 5176 |
| M257@-6.20 | 40.6 | 1.2 | 5044 |
| M257@-6.21 | 42.3 | 1.2 | 5175 |
| M257@-6.22 | 41.5 | 1.2 | 5167 |
| M257@-6.23 | 40.9 | 1.3 | 5107 |
| M257@-6.24 | 41.0 | 1.2 | 5130 |
| M257@-6.25 | 40.8 | 1.2 | 5088 |
| M257@-6.26 | 42.6 | 1.2 | 4999 |
| M257@-6.27 | 41.0 | 1.2 | 4957 |
| M257@-6.28 | 40.3 | 1.2 | 5037 |
| M257@-6.29 | 40.8 | 1.3 | 5038 |
| M257@-6.30 | 41.4 | 1.4 | 4949 |
| M257@-6.31 | 40.6 | 1.3 | 4935 |
| M257@-6.32 | 41.0 | 1.3 | 4931 |
| M257@-6.33 | 41.0 | 1.3 | 4766 |
| M257@-6.34 | 39.9 | 1.4 | 4866 |
| M257@-6.35 | 40.5 | 1.4 | 4859 |
| M257@-6.36 | 40.2 | 1.4 | 4829 |
| M257@-6.37 | 40.2 | 1.4 | 4870 |

|               |      |     |      |
|---------------|------|-----|------|
| NIST614@-6.1  | 55.3 | 1.6 | 3248 |
| NIST614@-6.2  | 53.5 | 1.6 | 3211 |
| NIST614@-6.3  | 54.1 | 1.8 | 3200 |
| NIST614@-6.4  | 55.6 | 1.8 | 3215 |
| NIST614@-6.5  | 54.5 | 1.5 | 3226 |
| NIST614@-6.6  | 53.8 | 1.5 | 3248 |
| NIST614@-6.7  | 53.7 | 1.7 | 3264 |
| NIST614@-6.8  | 54.2 | 1.5 | 3276 |
| NIST614@-6.9  | 52.9 | 1.5 | 3270 |
| NIST614@-6.10 | 53.2 | 1.5 | 3298 |
| NIST614@-6.11 | 54.8 | 1.5 | 3282 |
| NIST614@-6.12 | 54.7 | 1.5 | 3313 |
| NIST614@-6.13 | 53.3 | 1.5 | 3274 |
| NIST614@-6.14 | 53.9 | 1.6 | 3278 |
| NIST614@-6.15 | 54.1 | 1.5 | 3293 |
| NIST614@-6.16 | 54.3 | 1.5 | 3327 |
| NIST614@-6.17 | 55.7 | 1.9 | 3155 |
| NIST614@-6.18 | 54.8 | 1.6 | 3232 |
| NIST614@-6.19 | 53.6 | 1.5 | 3247 |
| NIST614@-6.20 | 54.2 | 1.5 | 3224 |
| NIST614@-6.21 | 54.3 | 1.5 | 3246 |
| NIST614@-6.22 | 53.8 | 1.5 | 3276 |
| NIST614@-6.23 | 54.3 | 1.5 | 3255 |
| NIST614@-6.24 | 54.9 | 1.5 | 3275 |
| NIST614@-6.25 | 53.8 | 1.5 | 3265 |
| NIST614@-6.26 | 54.2 | 1.5 | 3292 |
| NIST614@-6.27 | 54.2 | 1.5 | 3241 |
| NIST614@-6.28 | 53.0 | 1.5 | 3219 |

---


$$\delta^7\text{Li} (\text{‰}) = \delta^7\text{Li}_m - \text{IMF}, \text{ IMF} = \delta^7\text{Li}_{m(\text{M257})} - 2.1$$
